# Supplementary material
Source: Royal Society of Chemistry journal article supplement (https://www.rsc.org/suppdata/cc/1999/1461/903676h.doc)
Supplement: Supplementary file 1 [file 903676h.doc]

### Supplementary Material

**Facile and general syntheses of 3- and/or 5-substituted 7*H*-pyrazolo[4,3-*e*]-1,2,4-triazolo[4,3-*c*]pyrimidines as a new class of potential xanthine oxidase inhibitors**

# Tomohisa Nagamatsu* and Takayuki Fujita

## Faculty of Pharmaceutical Sciences, Okayama University, Tsushima, Okayama 700-8530, Japan. E-mail: nagamatsu@pheasant.pharm.okayama-u.ac.jp

**Table 1** Yields and inhibitory concentration (IC50) of

7*H*-pyrazolo[4,3-*e*]-1,2,4-triazolo[4,3-*c*]pyrimidines **4** and **10**

prepared against bovine milk xanthine oxidase

Substituent Product*a* Yield*b* IC50*C*

R No. (%) (M)

H **4a** (66, *B*) 0.184

Me **4b** (83, *B*), (64, *C*)0.250

*n*-C7H15 **4c** (75, *A*), (77, *C*) 0.069

Ph **4d** (85, *A*), (91, *C*)0.103

4-F-C6H4 **4e** (72, *A*), (91, *C*)0.062

4-Cl-C6H4 **4f** (71, *A*), (90, *C*)0.032

4-Me-C6H4 **4g** (67, *A*), (60, *C*)0.041

4-MeO-C6H4 **4h** (61, *A*), (88, *C*)0.053

4-O2N-C6H4 **4i** (60, *A*), (60, *C*)0.060

*n*-C7H15 **10c** (65) 0.189

Ph **10d** (81) 0.109

4-F-C6H4 **10e** (71)0.123

4-Cl-C6H4 **10f** (71)0.054

4-Me-C6H4 **10g** (74)0.064

4-MeO-C6H4 **10h** (91)0.107

4-O2N-C6H4 **10i** (77)0.150

*a*All new compounds were recrystallized from a mixture of

DMF and EtOH or H2O, and gave satisfactory spectroscopic

and elemental analyses and melting points above 300 °C

except for **10c** (260–261 °C).

*b*The yields with alphabetical letters in parentheses based on

the preparation by *Method A–C*.

*c*Allopurinol exhibited IC50: 24.3 M.
